# Supplementary material for: Polymorphic Molecular Signatures in Variable Regions of the Plasmodium falciparum var2csa DBL3x Domain Are Associated with Virulence in Placental Malaria
Source: MDPI journal article supplement (doi:10.3390/pathogens11050520), 2022-04-28
Supplement: s1 [file s1]

Supplementary Materials

Table S1. Summary of data obtained for primigravid women.

| Patient ID | Placental parasite density/uL | Percent placental parasitemia | UniqueSeq (contigs) | Copy # | Total Reads | Q Reads | Analysis Reads | Unused Q Reads | Unused Total Reads |
|------------|-------------------------------|-------------------------------|---------------------|--------|-------------|---------|----------------|----------------|--------------------|
| 10049      | 207090                        | 45.90                         | 2                   | 1.01   | 3158        | 3142    | 3129           | 13             | 29                 |
| 10079      | 36357                         | 7.80                          | 32                  | 1.07   | 5113        | 5103    | 4391           | 712            | 722                |
| 10221      | 8233                          | 1.00                          | 33                  | 1.21   | 3662        | 3616    | 3296           | 320            | 366                |
| 10224      | 90827                         | 56.50                         | 4                   | 2.85   | 5946        | 5930    | 5884           | 46             | 62                 |
| 10327      | 10010                         | 2.60                          | 23                  | 2.13   | 4777        | 4764    | 4541           | 223            | 236                |
| 10340      | 0                             | 0.00                          | 1                   | 4.14   | 2503        | 2441    | 2426           | 15             | 77                 |
| 10398      | 26910                         | 1.00                          | 5                   | 2.91   | 1975        | 1961    | 1894           | 67             | 81                 |
| 10450      | 0                             | 0.00                          | 7                   | 6.76   | 2298        | 2235    | 2206           | 29             | 92                 |
| 10460      | 563                           | 0.50                          | 3                   | 5.1    | 2443        | 2421    | 2398           | 23             | 45                 |
| 10465      | 217                           | 0.10                          | 1                   | 6.68   | 2330        | 2319    | 2303           | 16             | 27                 |
| 10506      | 4333                          | 1.30                          | 17                  | 4.86   | 4326        | 4318    | 4125           | 193            | 201                |
| 10549      | 520                           | 0.40                          | 23                  | 1.91   | 1354        | 1173    | 848            | 325            | 506                |
| 10626      | 10877                         | 7.10                          | 8                   | 2.01   | 2134        | 1472    | 1298           | 174            | 836                |
| 10696      | 58630                         | 17.90                         | 4                   | 5.39   | 1837        | 1642    | 1419           | 223            | 418                |
| 10737      | 0                             | 0.00                          | 28                  | 2.95   | 5449        | 5433    | 5206           | 227            | 243                |
| 10858      | 5619                          | 0.59                          | 4                   | 2.3    | 8311        | 956     | 940            | 16             | 7371               |
| 10895      | 107303                        | 6.56                          | 1                   | 1.1    | 2538        | 2091    | 2071           | 20             | 467                |
| 11202      | 6201                          | 0.27                          | 6                   | 1.27   | 1037        | 1027    | 983            | 44             | 54                 |
| 11318      | 27775                         | 3.37                          | 22                  | 6.1    | 1249        | 1237    | 936            | 301            | 313                |
| 11320      | 52389                         | 2.27                          | 8                   | 1.06   | 8137        | 1922    | 1758           | 164            | 6379               |
| 11332      | 2926                          | 0.20                          | 10                  | 2.8    | 2225        | 588     | 472            | 116            | 1753               |
| 11354      | 44243                         | 3.67                          | 6                   | 0.93   | 4043        | 1511    | 1403           | 108            | 2640               |
| 11434      | 38320                         | 0.60                          | 4                   | 1      | 1956        | 1904    | 1844           | 60             | 112                |
| Sum        |                               |                               | 252                 |        | 78801       | 59206   | 55771          | 3435           | 23030              |
| Mean       | 36967*                        | 7.98*                         | 11                  | 2.93   | 3426        | 2574    | 2424           | 149            | 1001               |
| SD         | 50329*                        | 15.46*                        | 10                  | 1.92   | 2002        | 1513    | 1468           | 158            | 1914               |
| Median     | 18894*                        | 1.79*                         | 6                   | 2.30   | 2503        | 2091    | 2071           | 108            | 243                |

Total number of sequences obtained for each 454 run is shown, including sequences used for downstream analysis (e.g. = Analysis Reads). Please refer to Study population, materials and methods section for detailed information on procedures about sequence clean-up and quality assessment.  
\*Calculation based on microscopically evident infections only.

**Table S2. Summary of data obtained for multigravid women.**

| Gravid-<br>ity | Patient<br>ID | Placental<br>parasite<br>den-<br>sity/uL | Percent<br>placen-<br>tal par-<br>a-<br>sitemia | Unique<br>Seq<br>(con-<br>tigs) | Copy # | Total<br>Reads | Q<br>Reads | Analy-<br>sis<br>Reads | Unused<br>Q Reads | Unused<br>Total<br>Reads |
|----------------|---------------|------------------------------------------|-------------------------------------------------|---------------------------------|--------|----------------|------------|------------------------|-------------------|--------------------------|
| 4              | 10324         | 4377                                     | 0.60                                            | 19                              | 6.68   | 1541           | 1524       | 773                    | 751               | 768                      |
| 4              | 10353         | 22187                                    | 0.80                                            | 11                              | 2.2    | 5639           | 5625       | 5547                   | 78                | 92                       |
| 3              | 10380         | 0                                        | 0.00                                            | 7                               | 1.02   | 2815           | 2784       | 2771                   | 13                | 44                       |
| 8              | 10473         | 0                                        | 0.00                                            | 14                              | 5.54   | 2342           | 2306       | 2270                   | 36                | 72                       |
| 3              | 10486         | 3380                                     | 0.70                                            | 10                              | 5.08   | 5445           | 5360       | 5242                   | 118               | 203                      |
| 3              | 10490         | 1213                                     | 0.40                                            | 13                              | 3.18   | 4550           | 4535       | 4477                   | 58                | 73                       |
| 3              | 10521         | 0                                        | 0.00                                            | 10                              | 7.21   | 2331           | 2322       | 2248                   | 74                | 83                       |
| 4              | 10551         | 217                                      | 0.30                                            | 10                              | 5.98   | 2478           | 1064       | 873                    | 191               | 1605                     |
| 3              | 10580         | 0                                        | 0.00                                            | 30                              | 9.63   | 4280           | 4037       | 3799                   | 238               | 481                      |
| 3              | 10608         | 40257                                    | 21.90                                           | 15                              | 5.08   | 3419           | 1861       | 1514                   | 347               | 1905                     |
| 3              | 10612         | 0                                        | 0.00                                            | 3                               | 4.23   | 3143           | 2853       | 2826                   | 27                | 317                      |
| 5              | 10640         | 0                                        | 0.00                                            | 1                               | 9.04   | 3509           | 3488       | 3450                   | 38                | 59                       |
| 9              | 10694         | 14083                                    | 2.60                                            | 4                               | 4.95   | 2039           | 1354       | 1282                   | 72                | 757                      |
| 4              | 10745         | 4680                                     | 2.26                                            | 9                               | 2.45   | 5355           | 5339       | 5259                   | 80                | 96                       |
| 2              | 10781         | 1552                                     | 0.58                                            | 28                              | 4.14   | 3413           | 3392       | 3139                   | 253               | 274                      |
| 5              | 10899         | 0                                        | 0.00                                            | 2                               | 2.2    | 2256           | 2193       | 2182                   | 11                | 74                       |
| 4              | 10948         | 867                                      | -                                               | 12                              | 6.92   | 4280           | 4270       | 4224                   | 46                | 56                       |
| 4              | 11186         | 172                                      | 0.00                                            | 8                               | 8.4    | 1608           | 1528       | 1477                   | 51                | 131                      |
| 3              | 11290         | 810                                      | 0.00                                            | 10                              | 5.62   | 1291           | 1274       | 1078                   | 196               | 213                      |
| 3              | 11295         | 2048                                     | 1.30                                            | 8                               | 4.55   | 4289           | 1866       | 1749                   | 117               | 2540                     |
| 3              | 11322         | 1921                                     | 0.20                                            | 9                               | 7.41   | 1584           | 1529       | 1421                   | 108               | 163                      |
| 3              | 11331         | 646                                      | 0.10                                            | 5                               | 1.28   | 2028           | 1982       | 1960                   | 22                | 68                       |
| 3              | 11335         | 2786                                     | 0.40                                            | 16                              | 6.4    | 1555           | 1516       | 1103                   | 413               | 452                      |
| 4              | 11336         | 458                                      | 0.10                                            | 5                               | 6.38   | 4289           | 1747       | 1541                   | 206               | 2748                     |
| 3              | 11340         | 1296                                     | 0.50                                            | 8                               | 4.91   | 2254           | 2242       | 2061                   | 181               | 193                      |

|   |         |        |       |     |      |       |       |       |      |       |
|---|---------|--------|-------|-----|------|-------|-------|-------|------|-------|
| 3 | 11416   | 386    | 0.29  | 3   | 4.65 | 2393  | 875   | 588   | 287  | 1805  |
|   | Sum     |        |       | 270 |      | 80126 | 68866 | 64854 | 4012 | 15272 |
|   | Mean:   | 4959*  | 2.06* | 10  | 5.19 | 3082  | 2649  | 2494  | 154  | 587   |
|   | SD:     | 10135* | 5.34* | 7   | 2.21 | 1294  | 1390  | 1449  | 160  | 796   |
|   | Median: | 1424*  | 0.54* | 9   | 5.08 | 2646  | 2217  | 2122  | 94   | 198   |

Total number of sequences obtained for each 454 run is shown, including sequences used for downstream analysis (e.g. Analysis Reads). Please refer to Study population, materials and methods section for detailed information on procedures about sequence clean-up and quality assessment. \*Calculation based on microscopically evident infections only.

**Table S3.** Sequence pairs sharing 99% or higher identity.

| Sequence 1 | Sequence 2 |
|------------|------------|
| 10049.C2   | 10490.C7   |
| 10221.C20  | 10549.C14  |
| 10608.C2   | 11186.C2   |
| 10221.C20  | 10450.C6   |
| 10224.C1   | 10450.C4   |
| 10612.C2   | 11290.C10  |
| 10221.C20  | 10465.C1   |
| 10353.C11  | 10506.C11  |
| 10737.C3   | 10745.C5   |
| 10327.C6   | 10506.C4   |
| 10450.C6   | 10465.C1   |
| 11322.C8   | 11331.C4   |
| 10380.C5   | 10473.C5   |
| 10450.C6   | 10549.C14  |
| 11322.C8   | 11336.C2   |
| 10380.C2   | 11336.C1   |
| 10473.C2   | 10486.C3   |
| 11331.C4   | 11336.C2   |
| 10473.C15  | 10580.C1   |
| 10473.C15  | 10899.C1   |
| 11322.C6   | 11336.C3   |
| 10549.C1   | 10608.C2   |
| 10580.C1   | 11336.C1   |

|          |           |
|----------|-----------|
| 11322.C8 | 11340.C6  |
| 10580.C3 | 10612.C2  |
| 10580.C3 | 11290.C10 |
| 11331.C4 | 11340.C6  |
| 10899.C1 | 11336.C1  |
| 11318.C6 | 11336.C1  |
| 11332.C9 | 11354.C4  |
| 11336.C2 | 11340.C6  |
| 10221.C2 | 10781.C4  |
| 10353.C5 | 10506.C5  |
| 10549.C1 | 11186.C2  |
| 10580.C1 | 10899.C1  |

In total, 56 sequences form 35 sequence pairs that share 99% or greater sequence identity. Sequences are named by sample number followed by contig number. These represent identical or near identical sequences found in different study subjects, on different dates and in some cases different study site locations. Sequence pairs outlined with a bold border are from different study sites, with Kisumu sequences in in the range of 10001 to 10450, and Siaya sequences represented by sample numbers > 10450.

**Table S4.** Univariate regression analysis of factors associated with amino acid motif carriage in DBL3X.

|                                                       | IISQNDKK          |        |          | IISRNPMK          |       |          | EGGEDGKGKQKE      |              |               | EKANNN            |              |               | NSNGLP            |       |          |
|-------------------------------------------------------|-------------------|--------|----------|-------------------|-------|----------|-------------------|--------------|---------------|-------------------|--------------|---------------|-------------------|-------|----------|
| Continuous variables                                  |                   |        |          |                   |       |          |                   |              |               |                   |              |               |                   |       |          |
|                                                       | Co-effi-<br>cient | SEM    | <i>P</i> | Co-effi-<br>cient | SEM   | <i>P</i> | Co-effi-<br>cient | SEM          | <i>P</i>      | Co-effi-<br>cient | SEM          | <i>P</i>      | Co-effi-<br>cient | SEM   | <i>P</i> |
| Age                                                   | -0.214            | 0.338  | 0.530    | 0.688             | 0.618 | 0.272    | -0.228            | 0.608        | 0.710         | 0.0753            | 0.558        | 0.893         | -0.224            | 0.501 | 0.658    |
| Gravidity                                             | -0.0347           | 0.115  | 0.765    | 0.071             | 0.211 | 0.738    | 0.100             | 0.207        | 0.631         | -0.0628           | 0.190        | 0.743         | -0.0108           | 0.171 | 0.950    |
| Placental<br>parasite<br>density <sup>a</sup>         | 0.0364            | 0.0966 | 0.708    | -0.0552           | 0.177 | 0.756    | 0.00151           | 0.174        | 0.993         | 0.210             | 0.159        | 0.194         | -0.153            | 0.143 | 0.291    |
| Percent<br>placental<br>para-<br>sitemia <sup>a</sup> | 0.0300            | 0.0861 | 0.729    | 0.0694            | 0.157 | 0.661    | -0.107            | 0.155        | 0.495         | 0.218             | 0.143        | 0.134         | -0.163            | 0.127 | 0.209    |
| Placental<br>hemozoin<br>burden <sup>b</sup>          | -0.0270           | 0.0737 | 0.717    | 0.104             | 0.131 | 0.433    | -0.0221           | 0.124        | 0.860         | <b>0.280</b>      | <b>0.119</b> | <b>0.0238</b> | -0.187            | 0.111 | 0.0996   |
| Peripheral<br>hemoglo-<br>bin <sup>c</sup>            | 0.143             | 0.155  | 0.363    | -0.135            | 0.330 | 0.686    | -0.0456           | 0.279        | 0.871         | -0.0581           | 0.267        | 0.829         | 0.0357            | 0.232 | 0.879    |
| Infant<br>birth<br>weight                             | 15.4              | 27.0   | 0.573    | -33.3             | 49.4  | 0.504    | 61.7              | 48.6         | 0.211         | -25.1             | 44.6         | 0.577         | 0.220             | 40.1  | 0.996    |
| Gesta-<br>tional age<br>at birth                      | -0.141            | 0.0802 | 0.0868   | -0.244            | 0.141 | 0.0899   | <b>0.289</b>      | <b>0.140</b> | <b>0.0455</b> | 0.149             | 0.123        | 0.232         | 0.00575           | 0.108 | 0.958    |

| Categorical variables                            |                     |          |                     |          |                     |          |                     |          |                     |          |
|--------------------------------------------------|---------------------|----------|---------------------|----------|---------------------|----------|---------------------|----------|---------------------|----------|
|                                                  | IISQNDKK            |          | IISRNPMK            |          | EGGEDGKGKQKE        |          | EKANNN              |          | NSNGLP              |          |
|                                                  | OR (95% CI)         | <i>P</i> |
| Gravidity group                                  | 1.02 (0.797, 1.30)  | 0.889    | 1.05 (0.672, 1.64)  | 0.827    | 1.08 (0.694, 1.70)  | 0.723    | 0.865 (0.574, 1.30) | 0.489    | 1.04 (0.721, 1.49)  | 0.841    |
| Upper quartile parasite density                  | 1.04 (0.745, 1.46)  | 0.803    | 0.561 (0.270, 1.16) | 0.120    | 1.07 (0.525, 2.19)  | 0.850    | 0.811 (0.440, 1.50) | 0.503    | 1.29 (0.715, 2.32)  | 0.399    |
| Upper quartile percent parasitemia               | 1.13 (0.763, 1.67)  | 0.545    | 0.875 (0.449, 1.70) | 0.694    | 0.332 (0.088, 1.26) | 0.105    | 0.760 (0.330, 1.75) | 0.521    | 1.32 (0.688, 2.54)  | 0.403    |
| Upper quartile hemozoin-WBCs                     | 1.07 (0.636, 1.81)  | 0.791    | 1.99 (0.950, 4.16)  | 0.0681   | 0.765 (0.382, 1.53) | 0.449    | 1.15 (0.557, 2.38)  | 0.705    | 0.724 (0.403, 1.30) | 0.278    |
| Placental histology group <sup>d</sup>           | 1.07 (0.751, 1.53)  | 0.702    | 1.03 (0.571, 1.86)  | 0.922    | 0.848 (0.446, 1.61) | 0.616    | 1.80 (0.971, 3.34)  | 0.0618   | 0.857 (0.494, 1.49) | 0.582    |
| Anemia                                           | 0.789 (0.564, 1.10) | 0.166    | 1.39 (0.685, 2.82)  | 0.362    | 0.948 (0.540, 1.66) | 0.852    | 1.29 (0.746, 2.23)  | 0.364    | 0.931 (0.568, 1.53) | 0.779    |
| Self-reported antimalarial drug use <sup>e</sup> | 1.09 (0.815, 1.47)  | 0.553    | 0.968 (0.580, 1.61) | 0.900    | 1.30 (0.788, 2.15)  | 0.305    | 0.972 (0.603, 1.57) | 0.908    | 0.875 (0.579, 1.32) | 0.527    |
| HIV sero-status                                  | 0.882 (0.619, 1.26) | 0.488    | 0.922 (0.476, 1.79) | 0.809    | 0.943 (0.542, 1.64) | 0.834    | 1.01 (0.567, 1.80)  | 0.977    | 1.19 (0.718, 1.98)  | 0.497    |
| Low birth weight                                 | 1.11 (0.691, 1.77)  | 0.674    | 1.66 (0.801, 3.44)  | 0.173    | 0.526 (0.248, 1.12) | 0.0937   | 0.861 (0.376, 1.97) | 0.723    | 1.05 (0.577, 1.90)  | 0.882    |
| Preterm birth                                    | 2.43 (0.878, 6.74)  | 0.0875   | 0.830 (0.117, 5.89) | 0.852    | 1.95 (0.064, 59.4)  | 0.701    | 0.768 (0.045, 13.1) | 0.855    | 0.367 (0.017, 8.05) | 0.524    |

Univariate linear regression analyses with continuous (linear regression) and categorical (logistic regression) variables as dependent variable and motif numbers at the patient level as predictors. Statistically significant results ( $p < 0.05$ ) are bolded; trending results ( $0.05 < p < 0.1$ ) are italicized.

Among categorical variables gravidity group tests multigravid status, parasitemia and hemozoin analyses test presence in the upper quartile, histology group tests chronic PM, anemia tests hemoglobin  $< 11$  g/dL, HIV tests HIV seropositivity, self-reported antimalarial drug use tests reported use of drugs, low birth weight tests birth weight  $\leq 2500$  g, and preterm birth tests gestational age  $< 37$  weeks.

<sup>a</sup> determined as summarized in Table 1 and Methods; parasitemia analyses done using log-transformed data. Percent placental parasitemia analysis omits one multigravida for whom a placental thin smear was unavailable.

<sup>b</sup> percent of white blood cells on a thick smear bearing phagocytosed hemozoin; log transformed data.

<sup>c</sup> data are missing for 16 clients.

<sup>d</sup> analysis omits six patients for whom histological analysis was unavailable.

<sup>e</sup> reported use of antipyretics is categorized as no antimalarial drug use.

**Table S5.** Univariate logistic regression analysis of sequence type dominance.

|                                                   | Type 1                      |               | Type 2                     |               | Type 3                      |               | Type 4                      |               |
|---------------------------------------------------|-----------------------------|---------------|----------------------------|---------------|-----------------------------|---------------|-----------------------------|---------------|
|                                                   | OR (CI)                     | P             | OR (CI)                    | P             | OR (CI)                     | P             | OR (CI)                     | P             |
| <b>Continuous variables</b>                       |                             |               |                            |               |                             |               |                             |               |
| Age                                               | 1.09 (0.951, 1.24)          | 0.224         | 1.00 (0.861, 1.17)         | 0.964         | 1.17 (0.989, 1.26)          | 0.0752        | <b>0.867 (0.766, 0.982)</b> | <b>0.0245</b> |
| Gravidity                                         | 1.43 (0.965, 2.11)          | 0.0745        | 0.538 (0.236, 1.23)        | 0.140         | 1.34 (0.941, 1.91)          | 0.104         | 0.746 (0.528, 1.05)         | 0.0949        |
| Placental parasite density <sup>a</sup>           | 1.08 (0.652, 1.78)          | 0.775         | 1.46 (0.740, 2.90)         | 0.274         | <b>0.585 (0.382, 0.895)</b> | <b>0.0136</b> | 1.23 (0.870, 1.74)          | 0.240         |
| Percent placental parasitemia <sup>a</sup>        | 1.00 (0.558, 1.80)          | 0.998         | 1.53 (0.741, 3.14)         | 0.252         | <b>0.556 (0.338, 0.916)</b> | <b>0.0211</b> | 1.27 (0.855, 1.89)          | 0.235         |
| Placental hemozoin burden <sup>b</sup>            | 0.829 (0.404, 1.70)         | 0.610         | 2.46 (0.680, 8.93)         | 0.170         | <b>0.548 (0.301, 0.997)</b> | <b>0.0490</b> | 1.31 (0.780, 2.20)          | 0.308         |
| Peripheral hemoglobin <sup>c</sup>                | 0.716 (0.374, 1.37)         | 0.314         | 0.995 (0.635, 1.56)        | 0.983         | 0.990 (0.680, 1.44)         | 0.959         | 1.10 (0.792, 1.52)          | 0.581         |
| Infant birth weight                               | 1.00 (0.998, 1.00)          | 0.881         | <b>0.998 (0.995, 1.00)</b> | <b>0.0403</b> | 1.00 (0.999, 1.00)          | 0.273         | 1.00 (0.999, 1.00)          | 0.506         |
| Gestational age at birth                          | <b>0.431 (0.202, 0.922)</b> | <b>0.0300</b> | 0.951 (0.478, 1.89)        | 0.885         | 1.16 (0.636, 2.11)          | 0.630         | 1.48 (0.879, 2.47)          | 0.141         |
| <b>Categorical variables</b>                      |                             |               |                            |               |                             |               |                             |               |
| Gravidity group                                   | 18.1 (0.912, 358)           | 0.0575        | 0.114 (0.015, 1.34)        | 0.0886        | 4.67 (0.876, 24.8)          | 0.0711        | <b>0.273 (0.083, 0.898)</b> | <b>0.0325</b> |
| Upper quartile parasite density                   | 0.206 (0.009, 4.50)         | 0.316         | 2.19 (0.339, 14.1)         | 0.410         | 0.134 (0.006, 2.85)         | 0.198         | 4.67 (0.876, 24.9)          | 0.0710        |
| Upper quartile percent parasitemia                | 0.312 (0.013, 7.23)         | 0.468         | 1.00 (0.101, 9.93)         | 1.00          | 0.171 (0.008, 3.82)         | 0.265         | 7.74 (0.870, 68.8)          | 0.0665        |
| Upper quartile hemozoin-WBCs                      | 0.510 (0.019, 13.6)         | 0.688         | 6.34 (0.804, 49.9)         | 0.0797        | 0.917 (0.091, 9.25)         | 0.941         | 0.551 (0.083, 3.64)         | 0.536         |
| Placental histology group <sup>d</sup>            | 0.542 (0.095, 3.08)         | 0.489         | 6.32 (0.291, 137)          | 0.240         | 0.290 (0.067, 1.26)         | 0.0980        | 1.87 (0.535, 6.53)          | 0.327         |
| Anemia                                            | 1.29 (0.074, 22.4)          | 0.863         | 2.13 (0.307, 14.7)         | 0.445         | 1.36 (0.278, 6.68)          | 0.702         | 0.510 (0.129, 2.02)         | 0.339         |
| HIV serostatus                                    | 2.96 (0.448, 19.5)          | 0.260         | 0.374 (0.016, 8.96)        | 0.544         | 0.611 (0.065, 5.75)         | 0.667         | 1.21 (0.241, 6.09)          | 0.815         |
| Self-reported anti-malarial drug use <sup>e</sup> | <b>0.182 (0.034, 0.980)</b> | <b>0.0473</b> | 0.582 (0.101, 3.34)        | 0.544         | 3.67 (0.414, 32.5)          | 0.243         | 1.75 (0.466, 6.57)          | 0.407         |

|                 |                             |               |                         |               |                        |       |                        |       |
|-----------------|-----------------------------|---------------|-------------------------|---------------|------------------------|-------|------------------------|-------|
| Low birthweight | 0.571 (0.020,<br>16.4)      | 0.744         | <b>42.0 (3.29, 537)</b> | <b>0.0040</b> | 0.376 (0.013,<br>10.6) | 0.566 | 0.267 (0.026,<br>2.76) | 0.268 |
| Preterm birth   | <b>15.6 (1.19,<br/>205)</b> | <b>0.0365</b> | 3.90 (0.297,<br>51.2)   | 0.300         | 0.470 (0.014,<br>15.4) | 0.671 | 0.120 (0.004,<br>3.85) | 0.231 |

Univariate regression analysis with group membership as dependent variable and continuous (linear regression) and categorical (logistic regression) variables as predictors. Statistically significant results are bolded; trending results are italicized.

OR (CI) = Odds Ratio (95% confidence interval). NA = not applicable. Results with  $p < 0.05$  are bolded and results with  $0.05 < p < 0.1$  are italicized. All results with  $p < 0.1$  are presented graphically in Figure 4A.

Among categorical variables gravidity group tests multigravid status, parasitemia and hemozoin analyses test presence in the upper quartile, histology group tests chronic PM, anemia tests hemoglobin  $< 11$  g/dL, HIV tests HIV seropositivity, self-reported antimalarial drug use tests reported use of drugs, low birth weight tests birth weight  $\leq 2500$  g, and preterm birth tests gestational age  $< 37$  weeks.

<sup>a</sup> determined as summarized in Table 1 and Methods; parasitemia analyses done using log-transformed data. Percent placental parasitemia analysis omits one multigravida for whom a placental thin smear was unavailable.

<sup>b</sup> percent of white blood cells on a thick smear bearing phagocytosed hemozoin; log transformed data.

<sup>c</sup> data are missing for 16 clients.

<sup>d</sup> analysis omits six patients for whom histological analysis was unavailable.

<sup>e</sup> reported use of antipyretics is categorized as no antimalarial drug use.

**Table S6.** Multiple logistic regression analysis of sequence type dominance.

|                                                   | Type 1                      |               | Type 2                  |               | Type 3                      |               | Type 4                      |               |
|---------------------------------------------------|-----------------------------|---------------|-------------------------|---------------|-----------------------------|---------------|-----------------------------|---------------|
|                                                   | OR (CI)                     | P             | OR (CI)                 | P             | OR (CI)                     | P             | OR (CI)                     | P             |
| <b>Continuous variables</b>                       |                             |               |                         |               |                             |               |                             |               |
| Age                                               | NA                          |               | NA                      | -             | 1.07 (0.885, 1.30)          | 0.477         | <b>0.784 (0.616, 0.998)</b> | <b>0.0486</b> |
| Gravidity                                         | NA                          | -             | NA                      | -             | NA                          | -             | 1.53 (0.771, 3.02)          | 0.225         |
| Placental parasite density <sup>a</sup>           | NA                          | -             | NA                      | -             | <b>0.139 (0.021, 0.918)</b> | <b>0.0405</b> | NA                          | -             |
| Placental hemozoin burden <sup>b</sup>            | NA                          | -             | NA                      | -             | 9.51 (0.701, 129)           | 0.0904        | NA                          | -             |
| Gestational age at birth                          | 0.537 (0.254, 1.14)         | 0.104         | NA                      | -             | NA                          | -             | NA                          | -             |
| <b>Categorical variables</b>                      |                             |               |                         |               |                             |               |                             |               |
| Gravidity group                                   | 23.6 (0.91, 610)            | 0.0570        | 0.22 (0.014, 3.48)      | 0.283         | 0.816 (0.071, 9.33)         | 0.870         | NA                          | -             |
| Upper quartile percent parasitemia                | NA                          | -             | NA                      | -             | NA                          | -             | 11.8 (0.594, 233)           | 0.106         |
| Upper quartile hemozoin–WBCs                      | NA                          | -             | 10.4 (0.601, 179)       | 0.107         | NA                          | -             | NA                          | -             |
| Placental histology group <sup>c</sup>            | NA                          | -             | NA                      | -             | 0.399 (0.04, 4.00)          | 0.435         | NA                          | -             |
| Self-reported anti-malarial drug use <sup>d</sup> | <b>0.128 (0.017, 0.992)</b> | <b>0.0491</b> | NA                      | -             | NA                          | -             | NA                          | -             |
| Low birthweight                                   | NA                          | -             | <b>22.1 (1.31, 373)</b> | <b>0.0319</b> | NA                          | -             | NA                          | -             |

Multiple regression analysis with group membership as dependent variable and continuous (linear regression) and categorical (logistic regression) variables as predictors. Statistically significant results are bolded; trending results are italicized.

OR (CI) = Odds Ratio (95% confidence interval). NA = not applicable. Results with  $p < 0.05$  are bolded and results with  $0.05 < p < 0.1$  are italicized. Analyses considered variables with  $p < 0.1$  in univariate analysis, and all outcomes are shown in Figure 4B.

<sup>a</sup> determined as summarized in Table 1 and Methods; parasitemia analyses done using log-transformed data.

<sup>b</sup> percent of white blood cells on a thick smear bearing phagocytosed hemozoin; log transformed data.

<sup>c</sup> analysis omits six patients for whom histological analysis was unavailable.

<sup>d</sup> reported use of antipyretics is categorized as no antimalarial drug use.



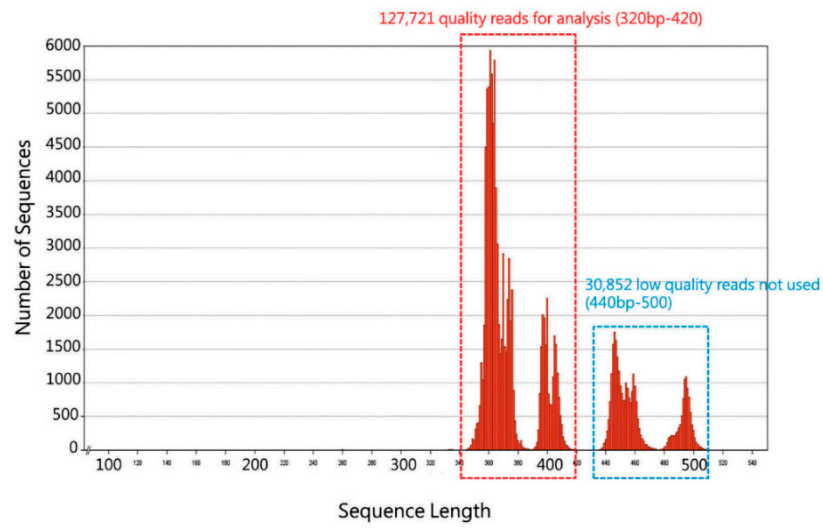

**Figure S1. Summary of total number of quality reads used.** Shown on the x-axis is the total number of sequences and y-axis the sequence lengths in base pairs (bp).

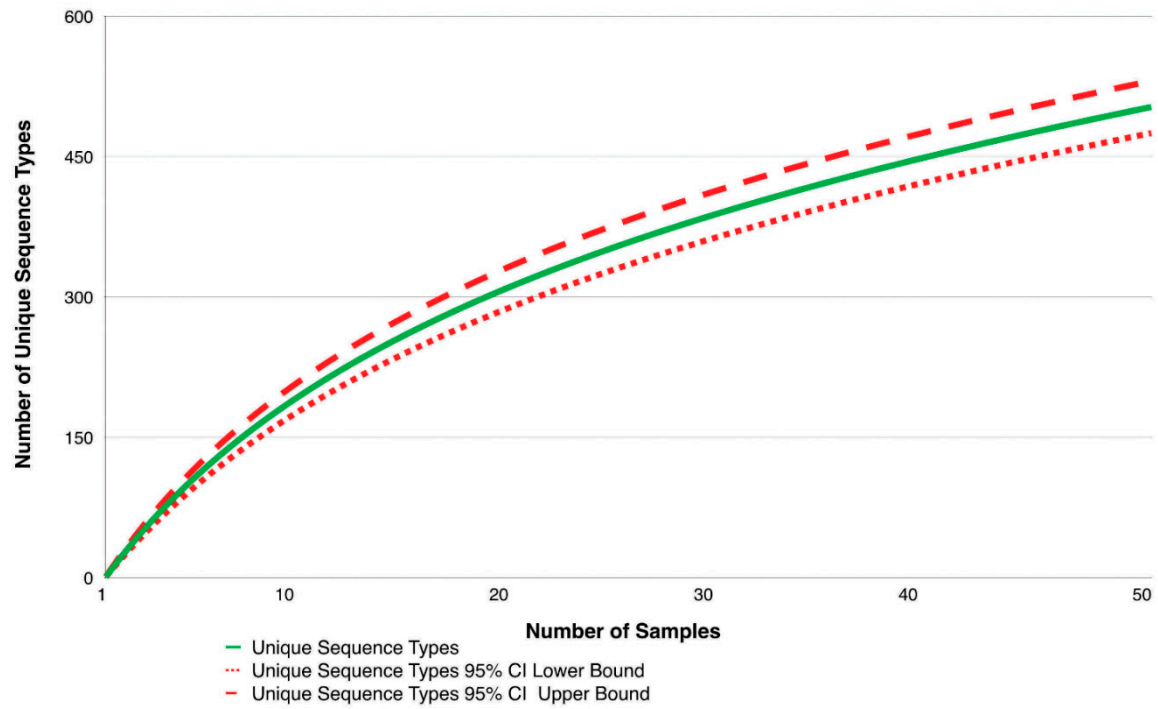

**Figure S2. Rarefaction curve of *var2csa* unique sequence types for entire study population (N = 49).** The computed rarefaction curve (in solid green) shows the expected average rate of unique sequence types that would be produced as a result of repeated deep sequencing. Upper and lower 95% confidence intervals (CI) for species richness are shown by dashed and dotted red lines, respectively.

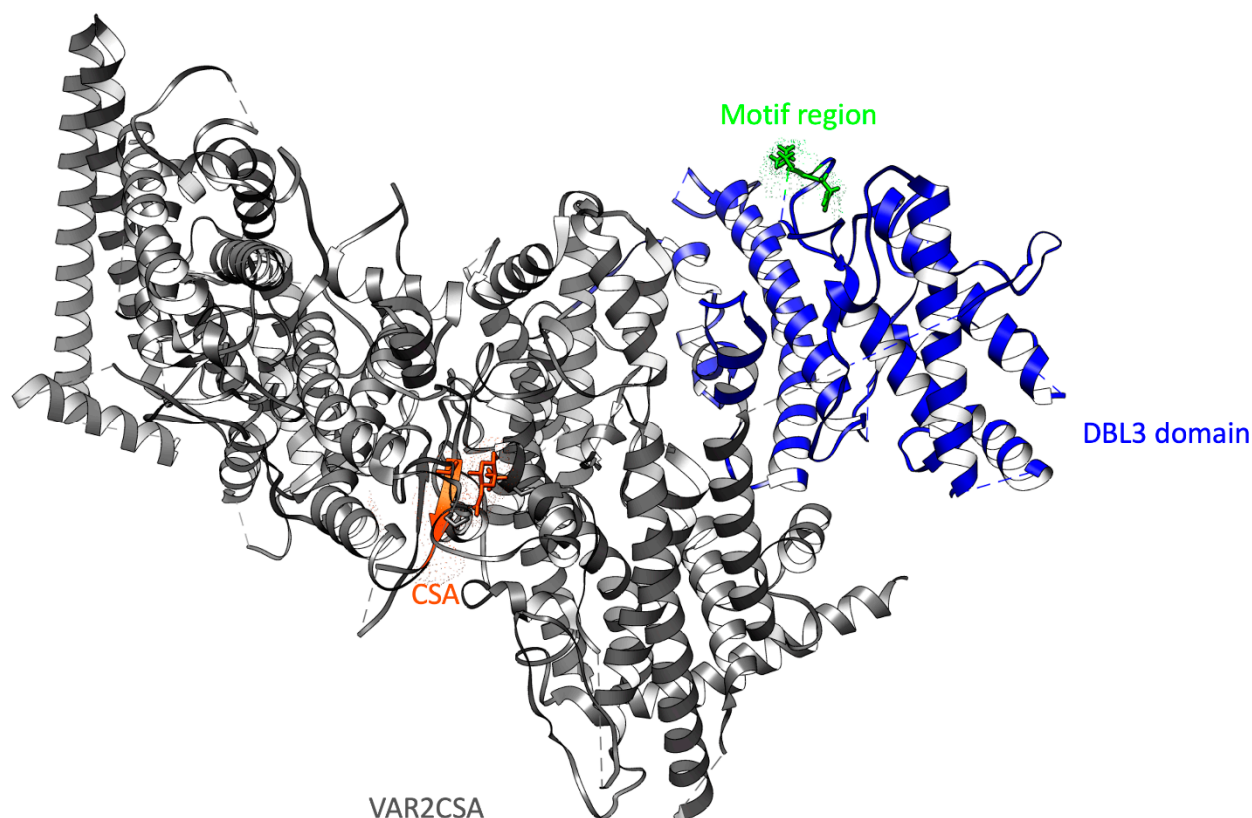

**Figure S3. VAR2CSA and DBL3X motif region.** A ribbon representation of VAR2CSA (grey), DBL3X domain (blue). Dotted circles and atom stick representation show the CSA binding site (orange) and specific motif region (green) associated with gravidity and placental malaria outcomes.

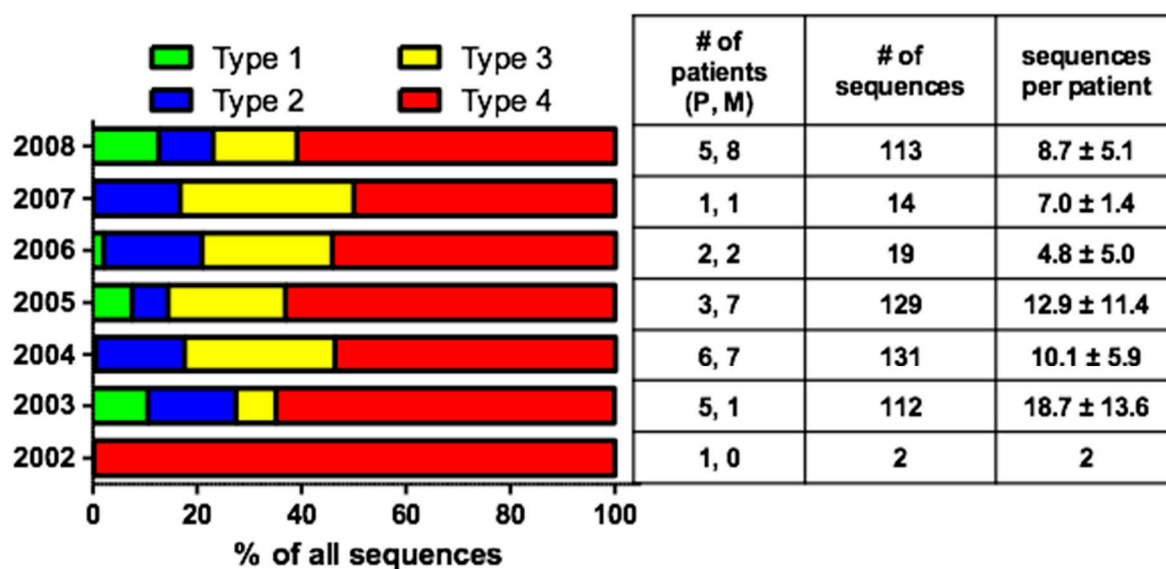

**Figure S4. DBL3X sequence types are consistently found independently of time and location of patient recruitment.** The graph depicts proportional distribution of sequence types by year of patient recruitment. The table at right summarizes number of patients recruited each year (stratified by gravidity group), number of unique sequences contributed by those patients, and the mean number of unique sequences per patient.

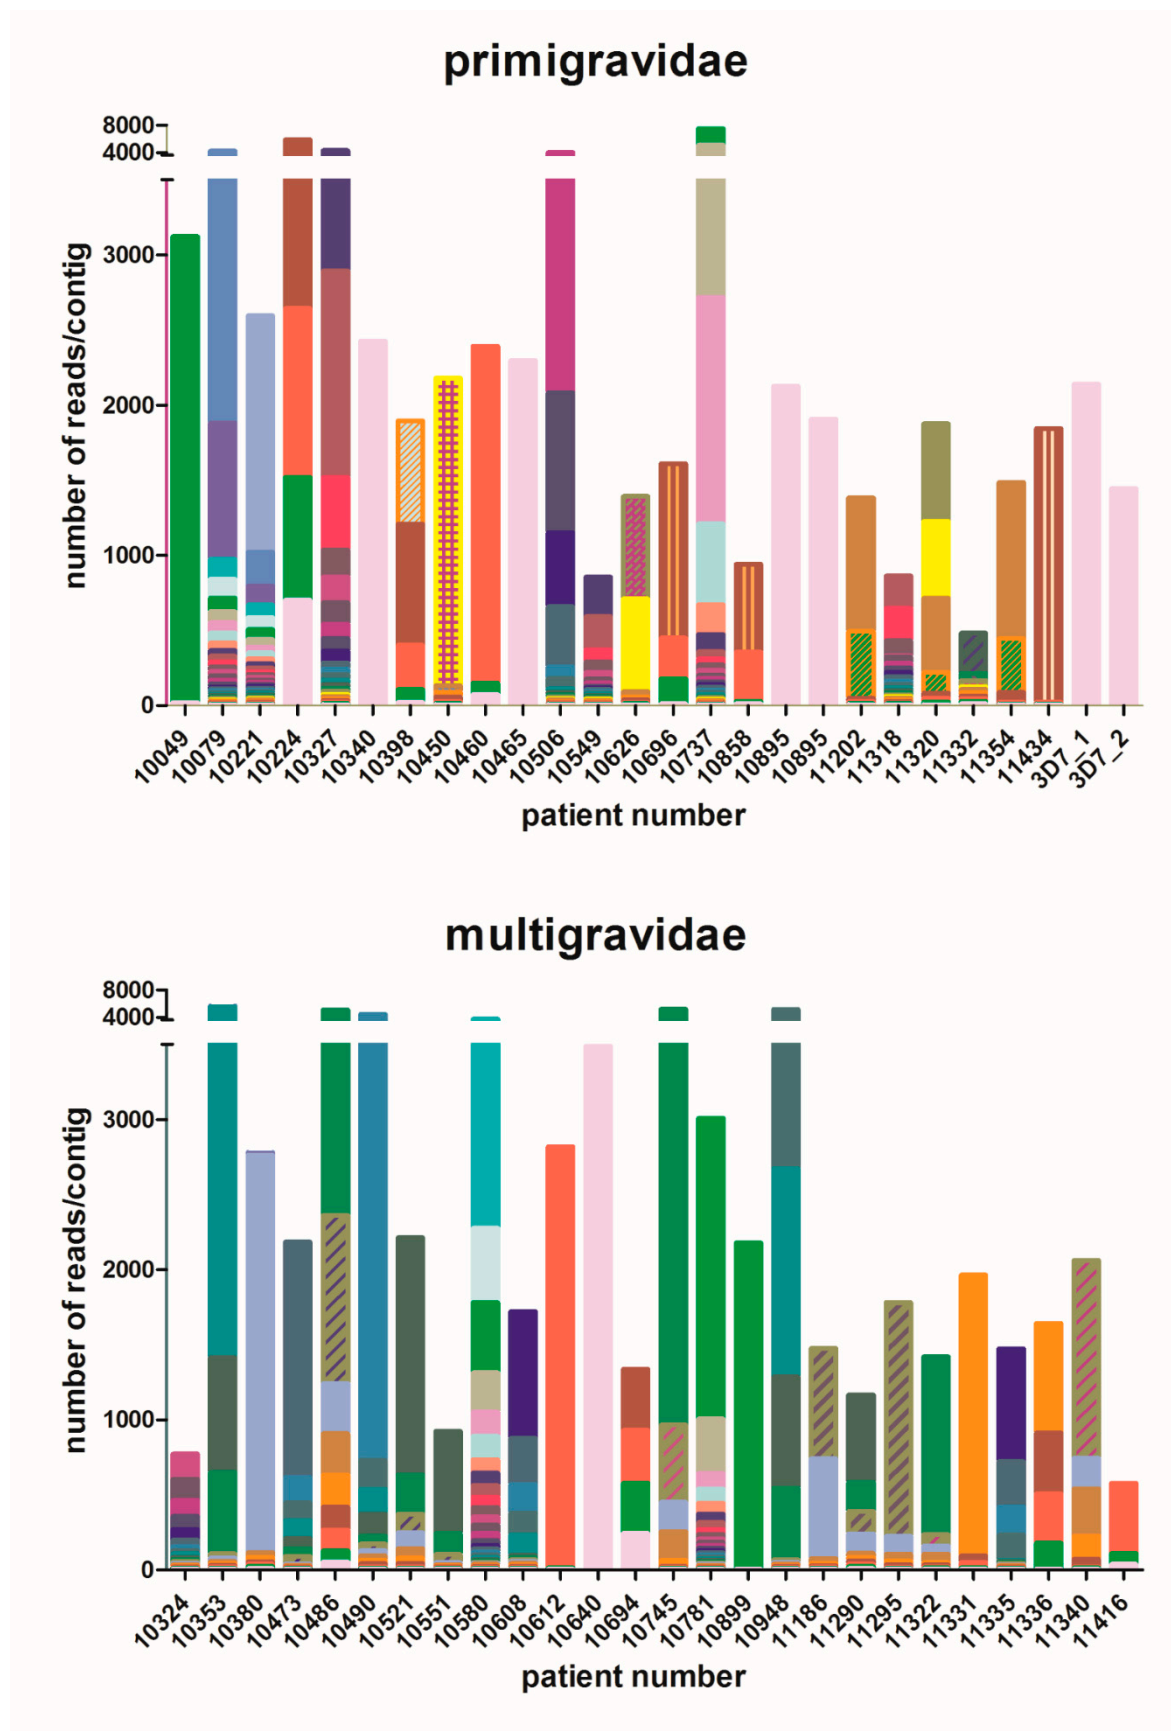

**Figure S5. Unique DBL3X sequences are not proportionally represented at the individual patient level.** The graphs depict the number of unique contigs within each patient. Notably, most patients have a single dominant contig. Patient 895 is depicted twice, representing two separate deep sequencing runs. This patient was previously identified (REF) as having a single unique sequence. DNA from the clonal laboratory isolate, 3D7, was also included as a control, and shows, in two

separate runs, a single contig. Similar colors across individual patients do *not* imply sequence similarity.

## Next Generation Sequencing: Method(s)

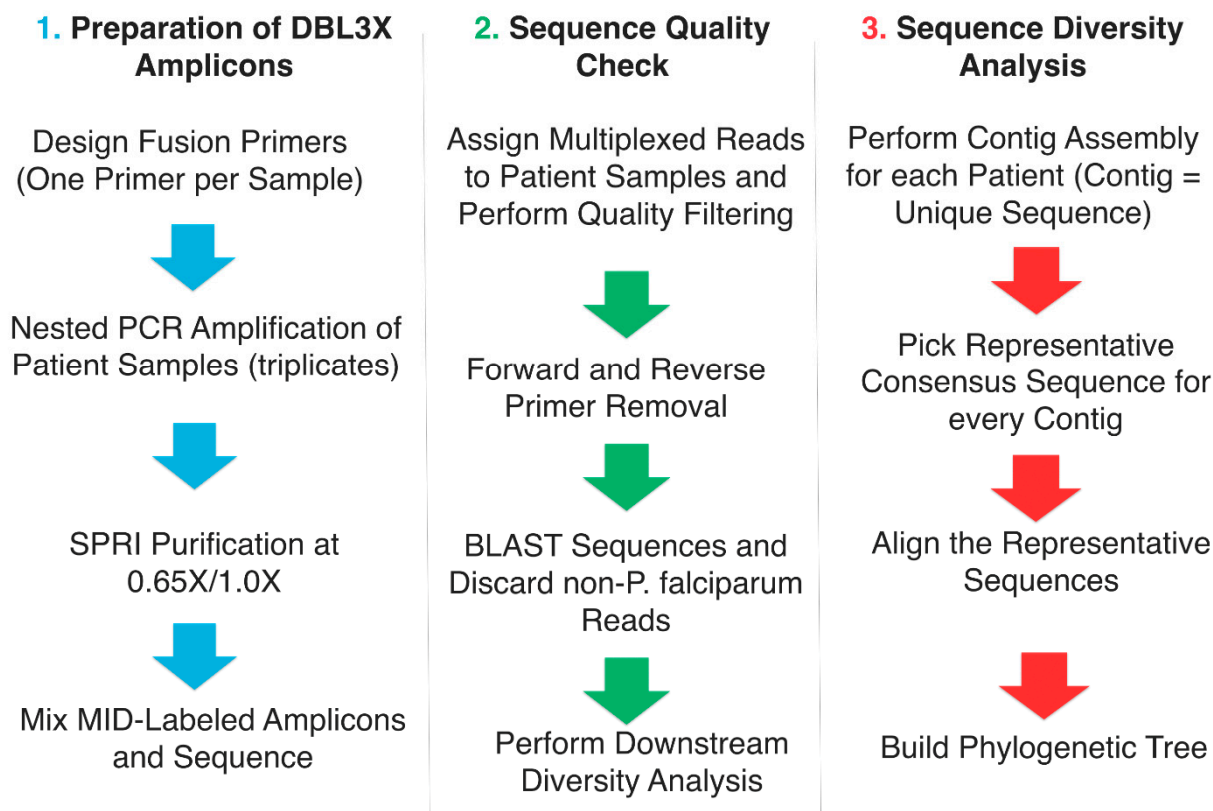

**Figure S6.** Schematic overview of the overall sequencing process.
